# Supplementary material for: Graphene quantum dots: efficient mechanosynthesis, white-light and broad linear excitation-dependent photoluminescence and growth inhibition of bladder cancer cells
Source: Royal Society of Chemistry journal article supplement (doi:10.1039/c9dt04575a), 2020-01-01
Supplement: c9dt04575a1.pdf [file c9dt04575a1.pdf]

## Supporting Information:

# Graphene Quantum Dots: Efficient Mechanochemical Synthesis, White-Light and Broad Linearly Excitation-Dependent Photoluminescence and Growth Inhibition on Bladder Cancer Cells

Maojun Deng, Xiaocong Cao, Lifang Guo, Hui Cao, Zhongliang Wen, Chaochao Mao, Kaimin Zuo, Xin Chen,\* Xiaolong Yu,\* Wenbing Yuan\*

**Table S1.** Experimental conditions of mechanochemical synthesis of N-GQD

| Samples        | Instrument types | Graphite amount | Melamine amount | KOH amount | Grinding frequency (rpm) | Yield (%) |
|----------------|------------------|-----------------|-----------------|------------|--------------------------|-----------|
| N-GQDs-300     | QM-3SP04         | 20mg            | 60mg            | 300mg      | 300                      | 33.7      |
| N-GQDs-600     | QM-3SP04         | 20mg            | 60mg            | 300mg      | 600                      | 61.1      |
| N-GQDs-500-0.5 | QM-3SP2          | 0.5g            | 1.5g            | 7.5g       | 500                      | 26.3      |
| N-GQDs-500-1.0 | QM-3SP2          | 1.0g            | 3.0g            | 15.0g      | 500                      | 23.8      |
| N-GQDs-500-1.5 | QM-3SP2          | 1.5g            | 4.5g            | 22.5g      | 500                      | 20.4      |
| N-GQDs-500-2.0 | QM-3SP2          | 2.0g            | 6.0g            | 30.0g      | 500                      | 18.9      |

**Table S2.** Carbon, nitrogen and oxygen bonding composition, (N1s)/(C1s) and (O1s)/(C1s) atomic ratios determined from the full-range XPS spectra (Figures 1k, 2h, S3 and S15a) for N-GQDs.

| Samples        | C%    | N%    | O%    | N1s/C1s | O1s/C1s |
|----------------|-------|-------|-------|---------|---------|
| N-GQDs-300     | 55.75 | 8.95  | 35.30 | 0.16    | 0.63    |
| N-GQDs-600     | 56.71 | 11.08 | 32.21 | 0.20    | 0.57    |
| N-GQDs-500-0.5 | 55.42 | 14.18 | 30.40 | 0.26    | 0.55    |
| N-GQDs-500-1.0 | 52.58 | 11.77 | 35.65 | 0.22    | 0.68    |
| N-GQDs-500-1.5 | 56.46 | 10.26 | 33.28 | 0.18    | 0.59    |
| N-GQDs-500-2.0 | 60.75 | 7.09  | 32.16 | 0.12    | 0.53    |

**Table S3.** Carbon bonding composition determined from the C1s XPS (Figures 1l, 2i, S4, S15b) for N-GQDs.

| Sample name    | Carbon Bonding Composition (%) |     |     |     |       |
|----------------|--------------------------------|-----|-----|-----|-------|
|                | C-C/C-H                        | C-N | C-O | C=O | O-C=O |
| N-GQDs-300     | 49                             | 4   | 20  | 24  | 3     |
| N-GQDs-600     | 53                             | 5   | 19  | 20  | 3     |
| N-GQDs-500-0.5 | 49                             | 6   | 19  | 23  | 3     |
| N-GQDs-500-1.0 | 45                             | 5   | 23  | 20  | 6     |

|                |    |   |    |    |   |
|----------------|----|---|----|----|---|
| N-GQDs-500-1.5 | 51 | 4 | 21 | 19 | 4 |
| N-GQDs-500-2.0 | 53 | 6 | 24 | 13 | 5 |

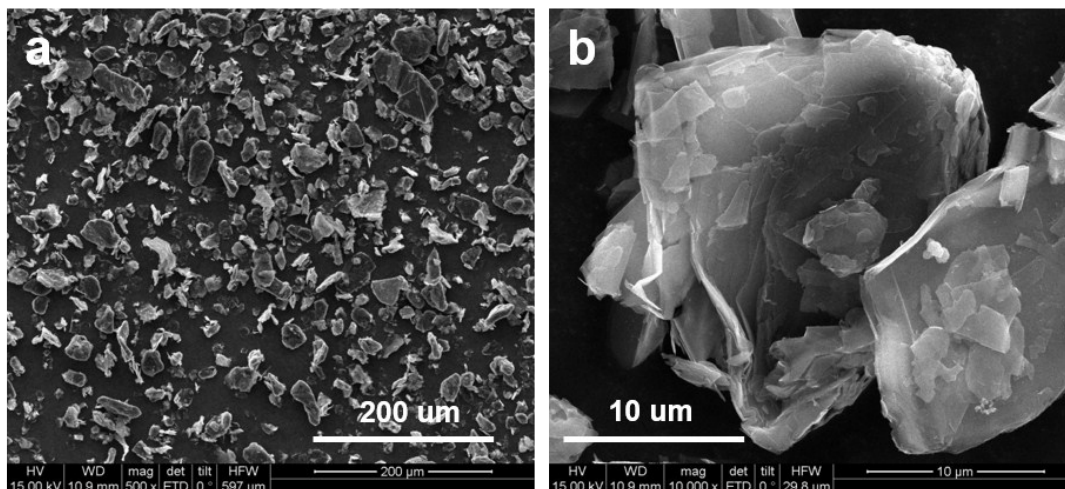

**Figure S1.** SEM images of the pristine graphite, which was used as a starting material to prepare N-GQDs.

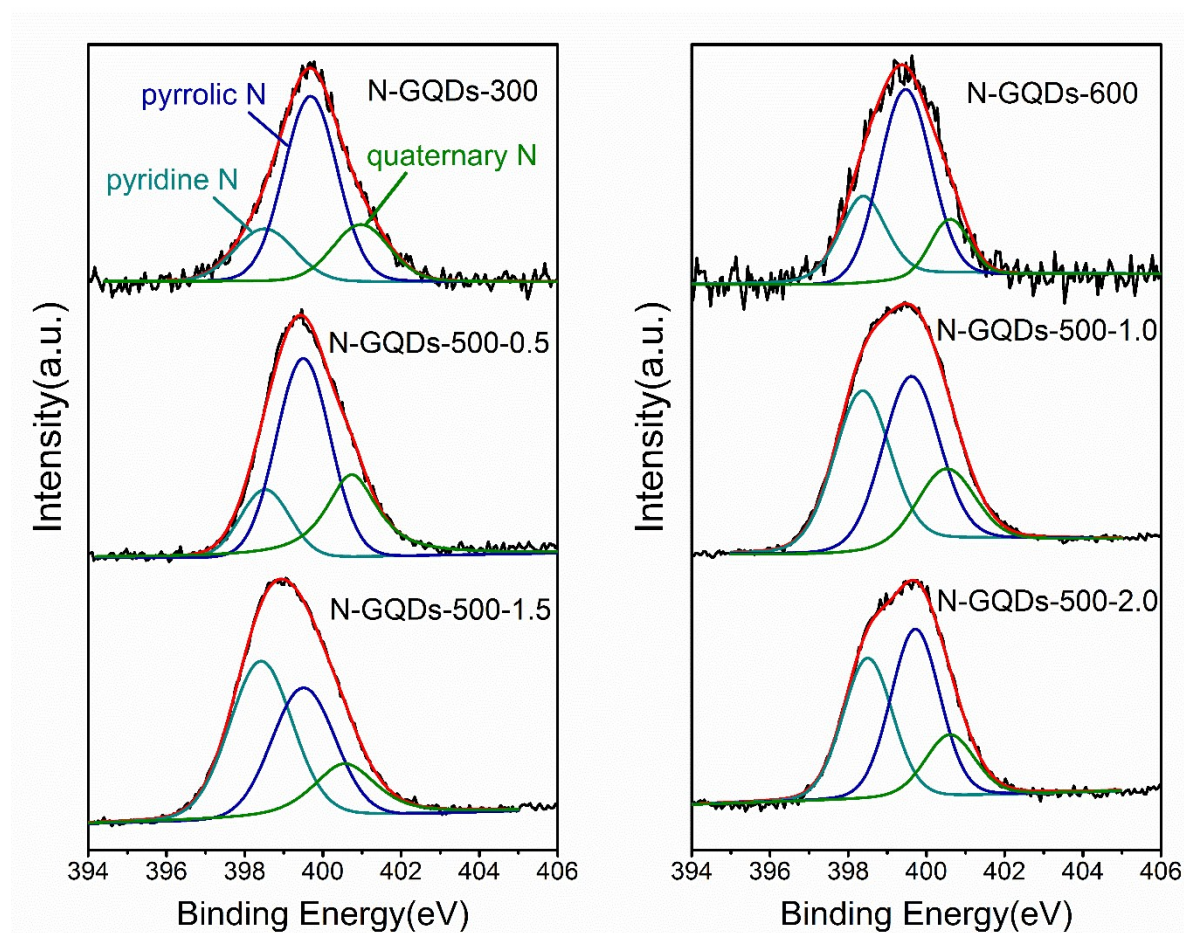

**Figure S2.** High-resolution XPS N1s spectra for samples N-GQDs-300, N-GQDs-600, N-GQDs-500-0.5, N-GQDs-500-1.0, N-GQDs-500-1.5 and N-GQDs-500-2.0.

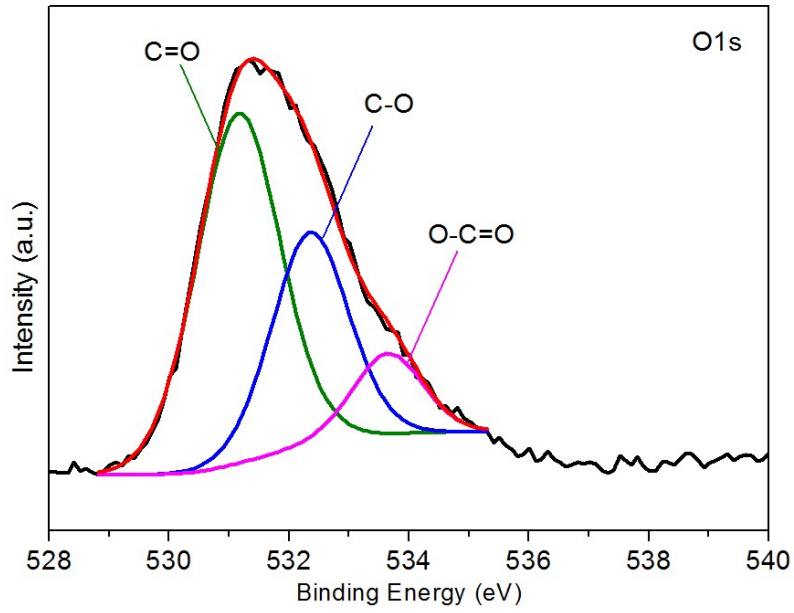

**Figure S3.** High resolution O1s XPS spectrum of N-GQDs-300.

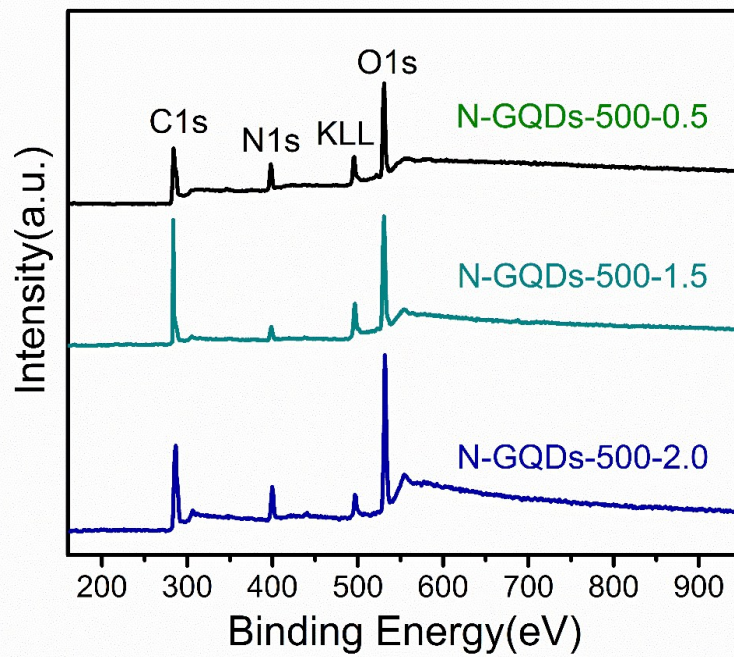

**Figure S4.** Survey XPS spectra for large-scale synthesized samples N-GQDs-500-0.5, N-GQDs-500-1.5 and N-GQDs-500-2.0.



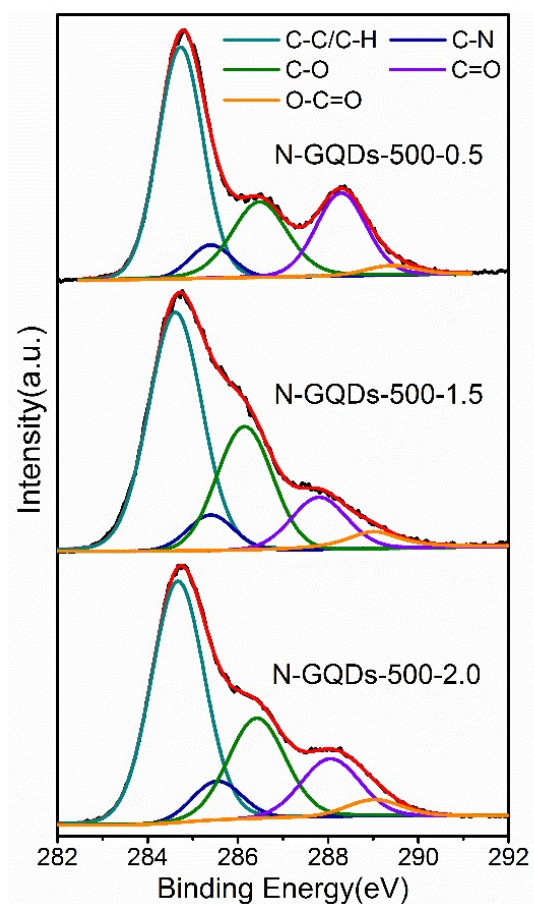

**Figure S5.** High-resolution C 1s spectra for samples N-GQDs-500-0.5, N-GQDs-500-1.5 and N-GQDs-500-2.0.

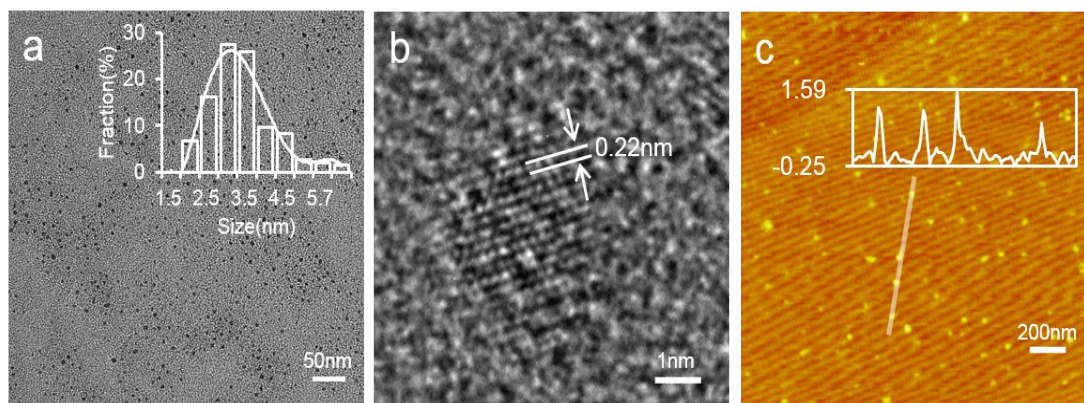

**Figure S6.** (a-c) TEM, HRTEM and AFM images of large-scale synthesized sample N-GQDs-500-2.0. The inset of (b) and (c) are size distribution of the dots and height profile of the selected area respectively.

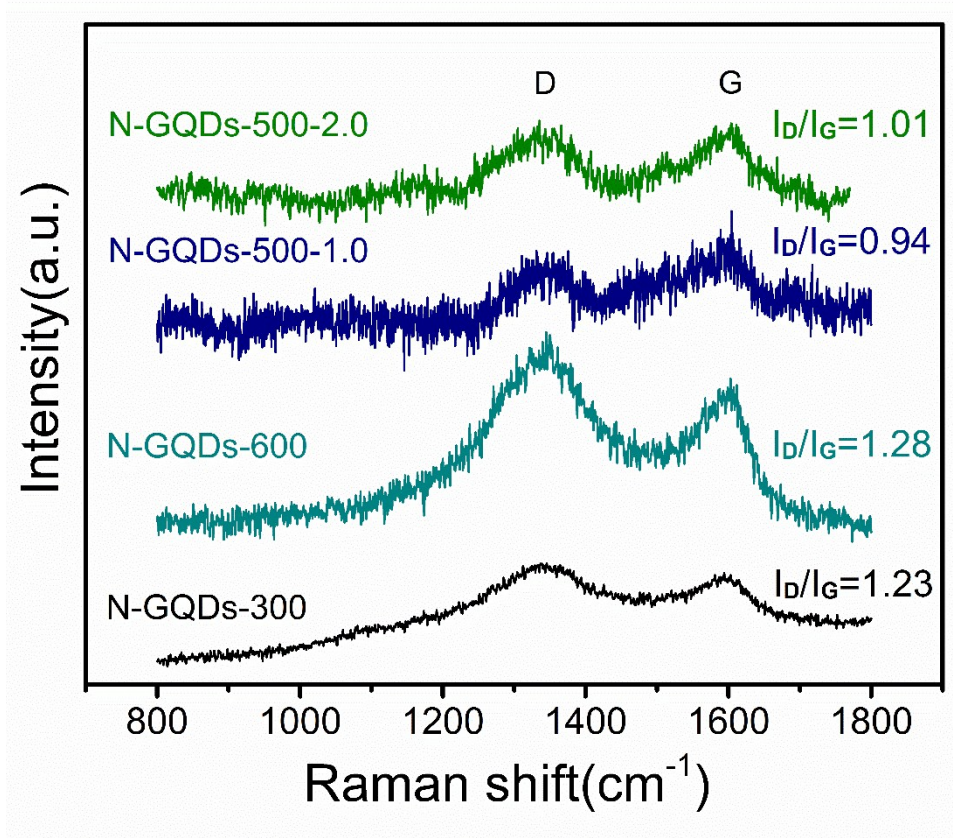

**Figure S7.** Raman spectra of N-GQDs-300, N-GQDs-600, N-GQDs-500-1.0 and N-GQDs-500-2.0 respectively.

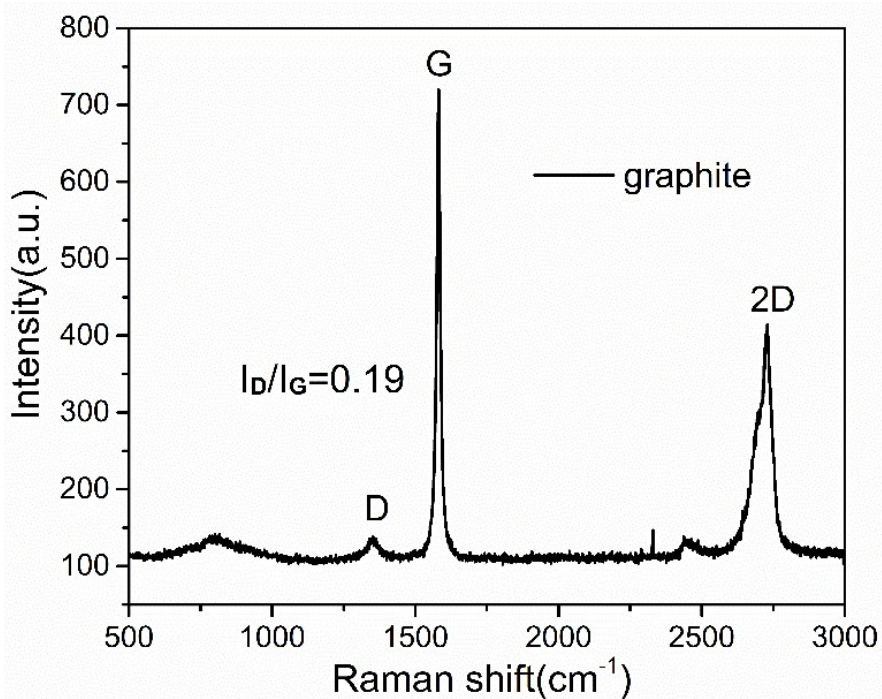

**Figure S8.** Raman spectrum of the pristine graphite, which was used as a starting material to prepare N-GQDs.



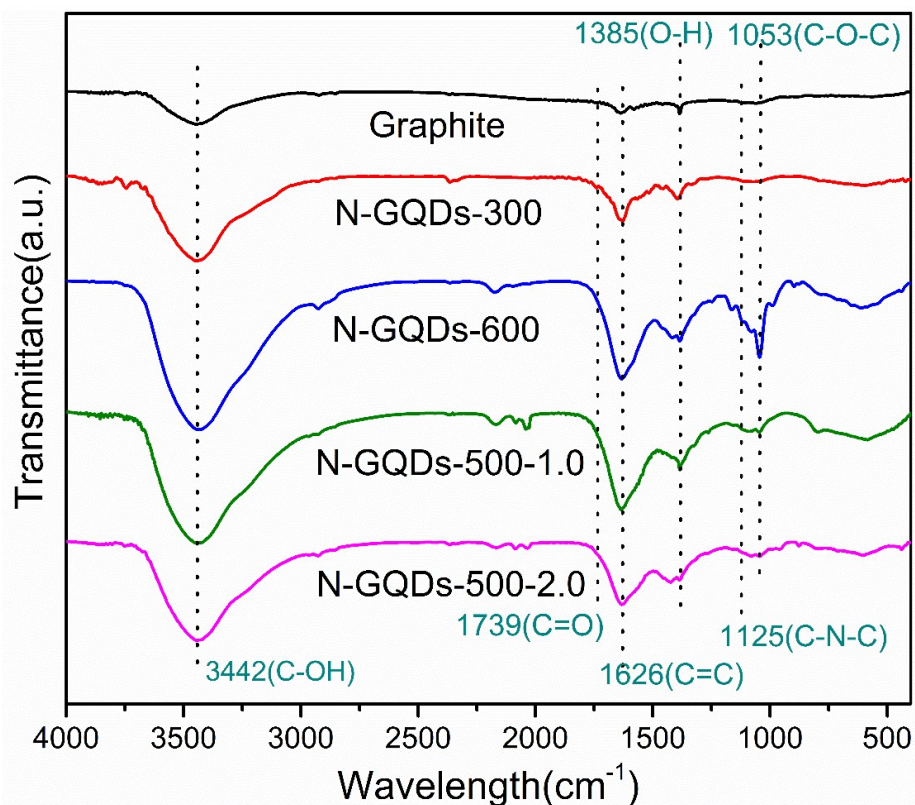

**Figure S9.** FT-IR spectra of samples graphite, N-GQDs-300, N-GQDs-600, N-GQDs-500-1.0 and N-GQDs-500-2.0.

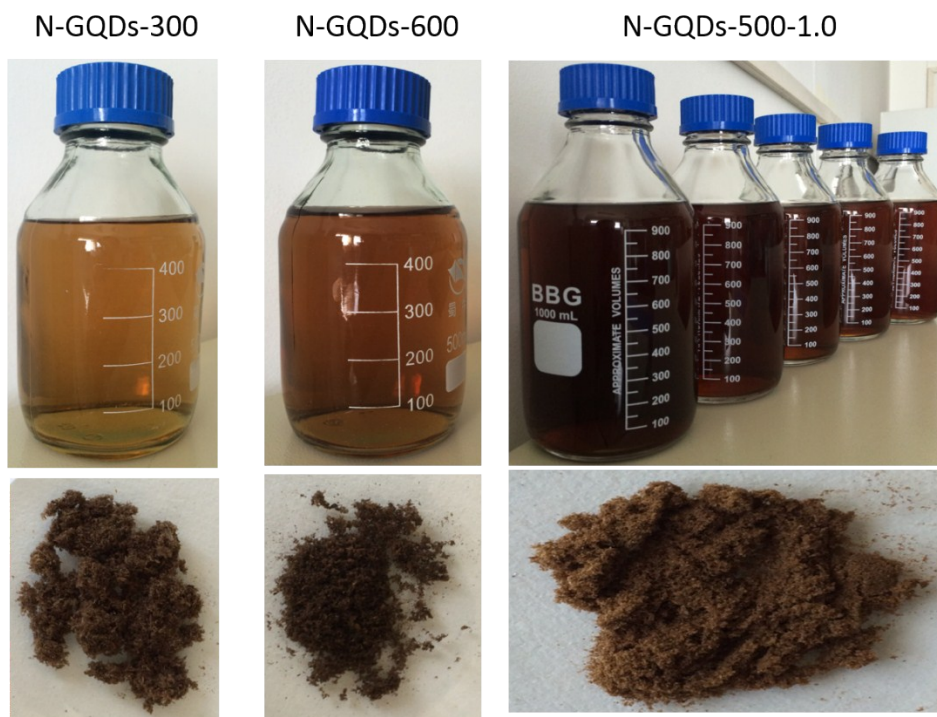

**Figure S10.** Photographs of the as-obtained N-GQDs-300, N-GQDs-600 and N-GQDs-500-1.0 in solid powder and aqueous solution state.

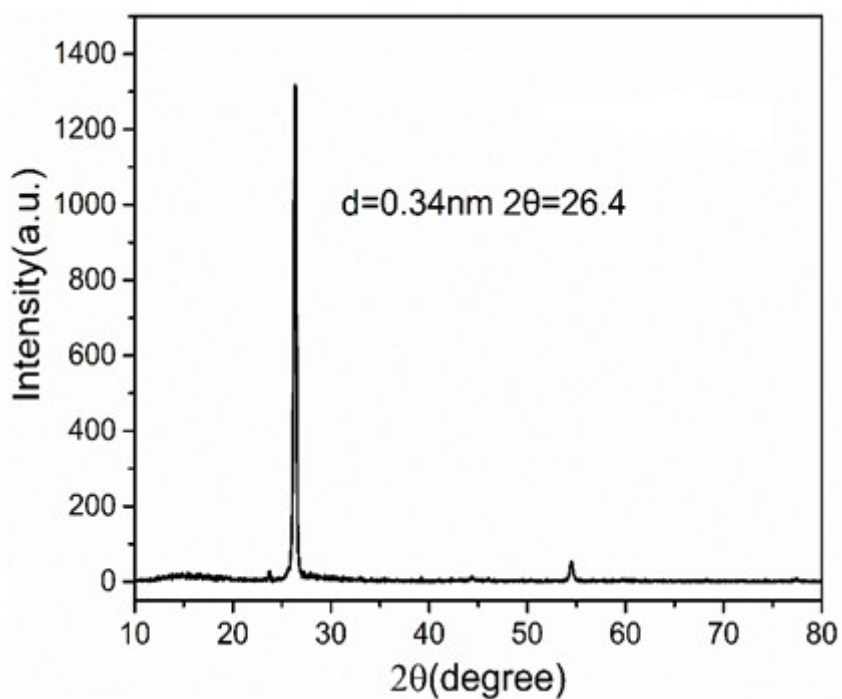

**Figure S11.** PXRD pattern of the pristine graphite, which was used as a starting material to prepare N-GQDs.

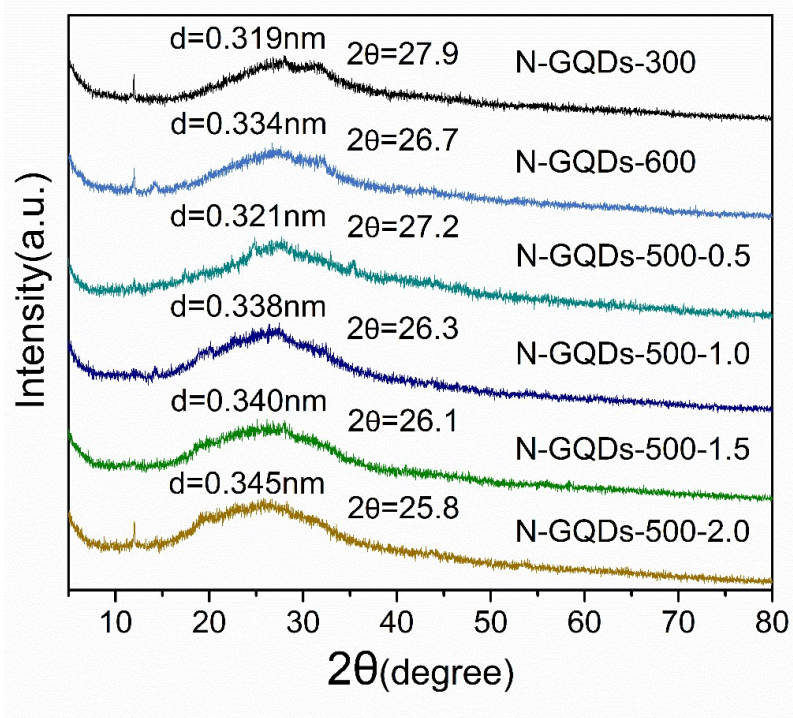

**Figure S12.** PXRD patterns of N-GQDs-300, N-GQDs-600, N-GQDs-500-0.5, N-GQDs-500-1.0, N-GQDs-500-1.5, and N-GQDs-500-2.0.

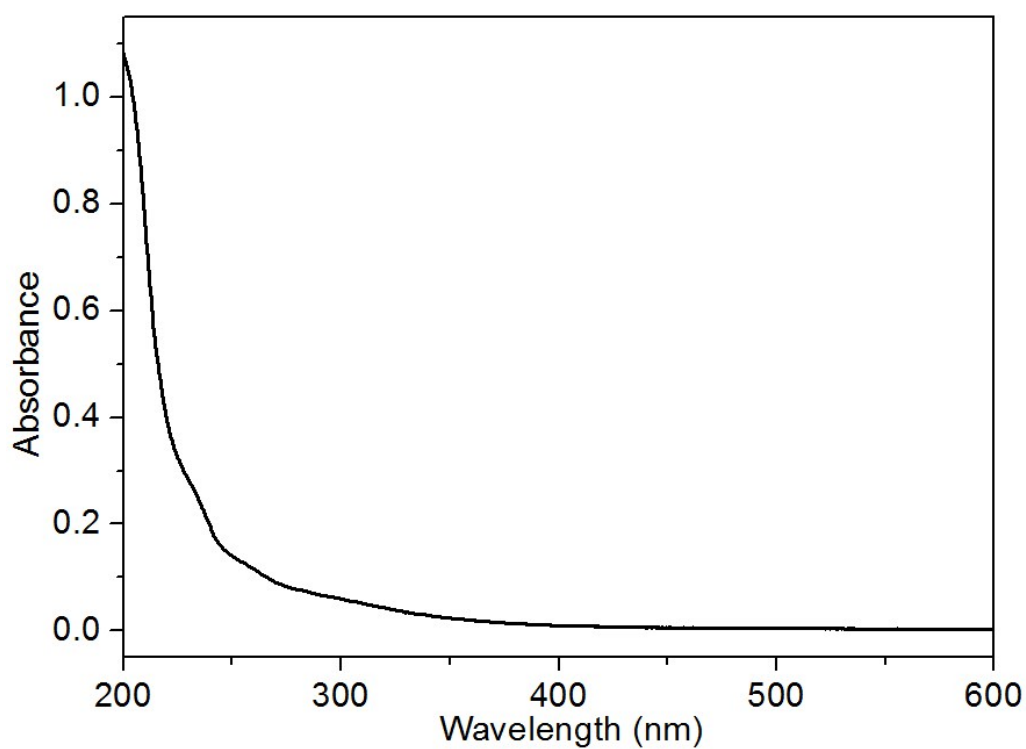

**Figure S13.** UV-Vis spectrum of N-GQDs-300 aqueous solution

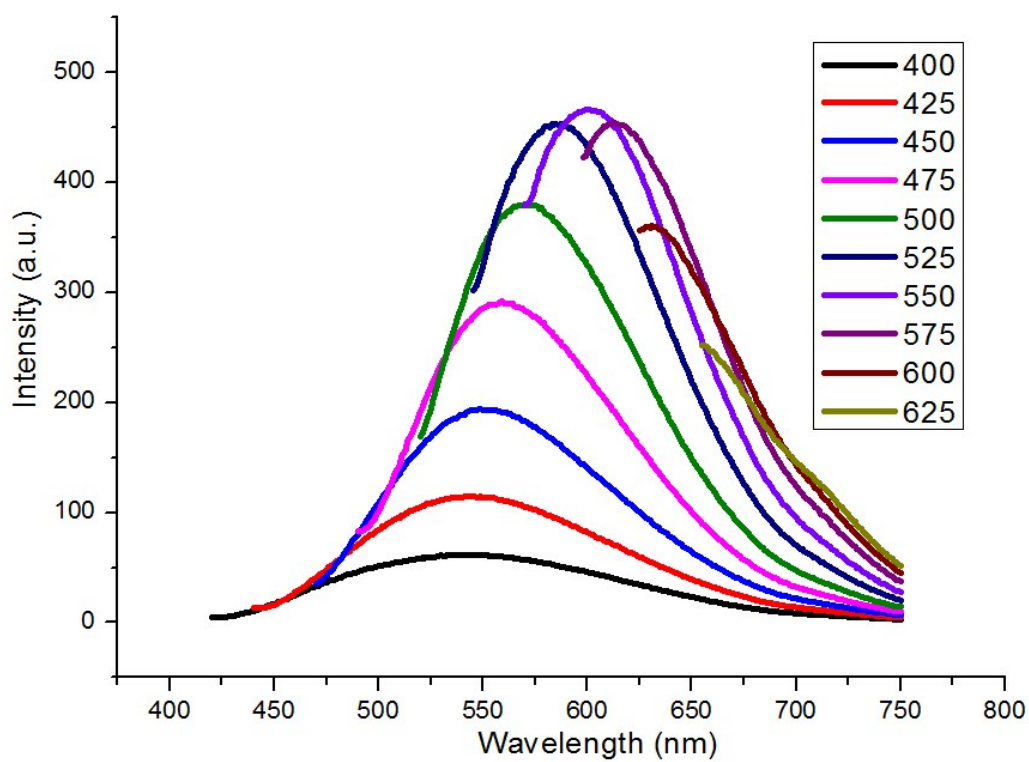

**Figure S14.** PL spectra of N-GQDs-600 aqueous solution depended on different excitation.



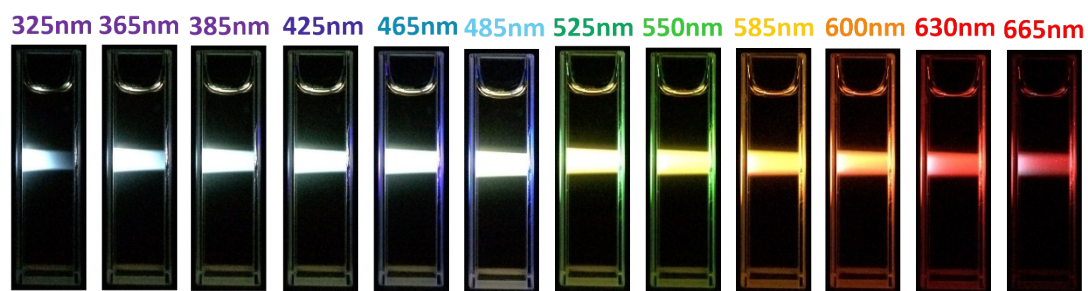

**Figure S15.** Optical photographs of N-GQDs-600 aqueous solution depended on different excitation wavelengths from 325-665nm.

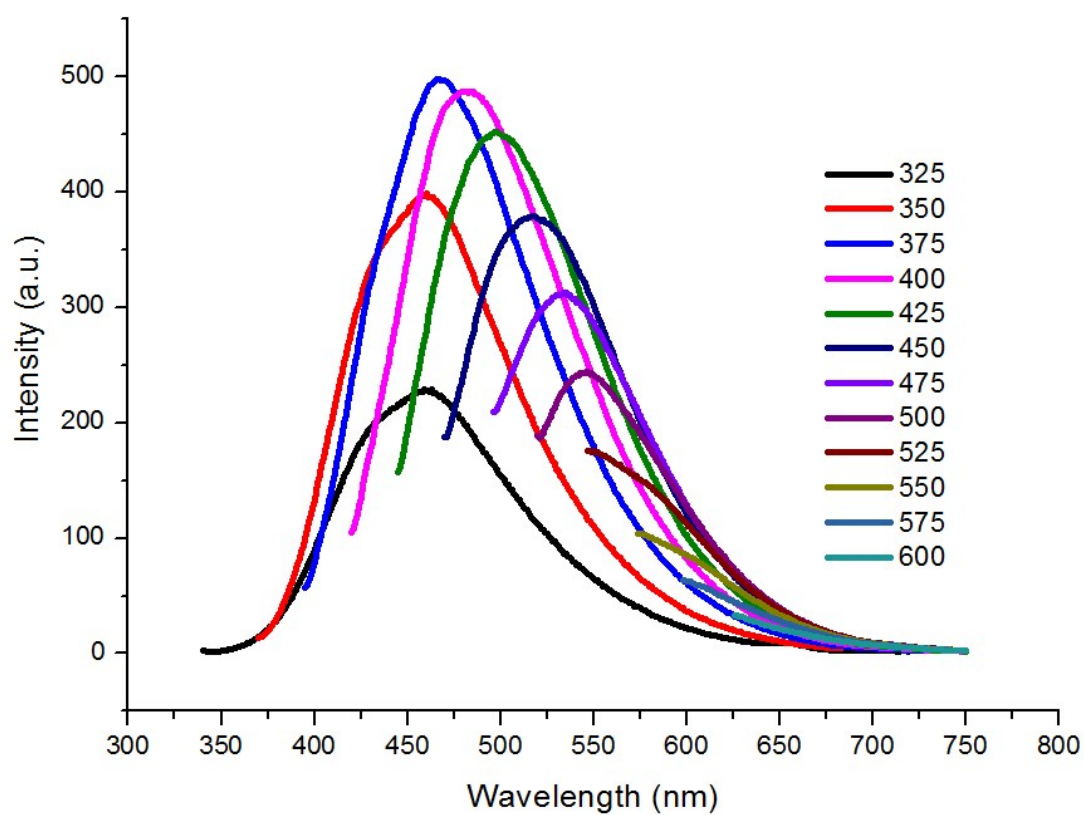

**Figure S16.** PL spectra of N-GQDs-500-1.0 aqueous solution depended on different excitation.

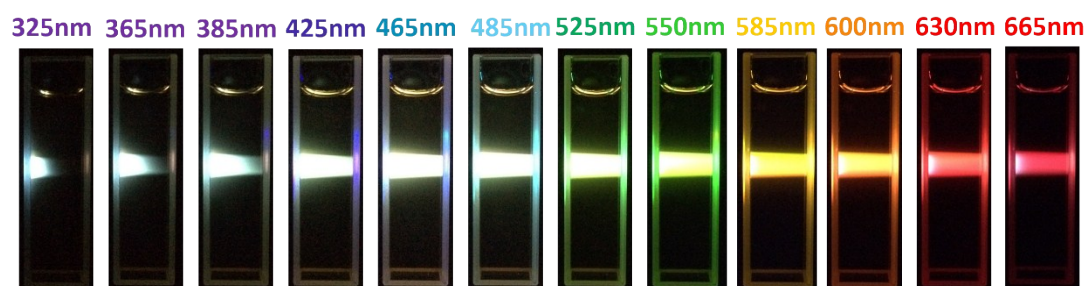

**Figure S17.** Optical photographs of N-GQDs-500-1.0 aqueous solution depended on excitation wavelengths from 325-665nm.

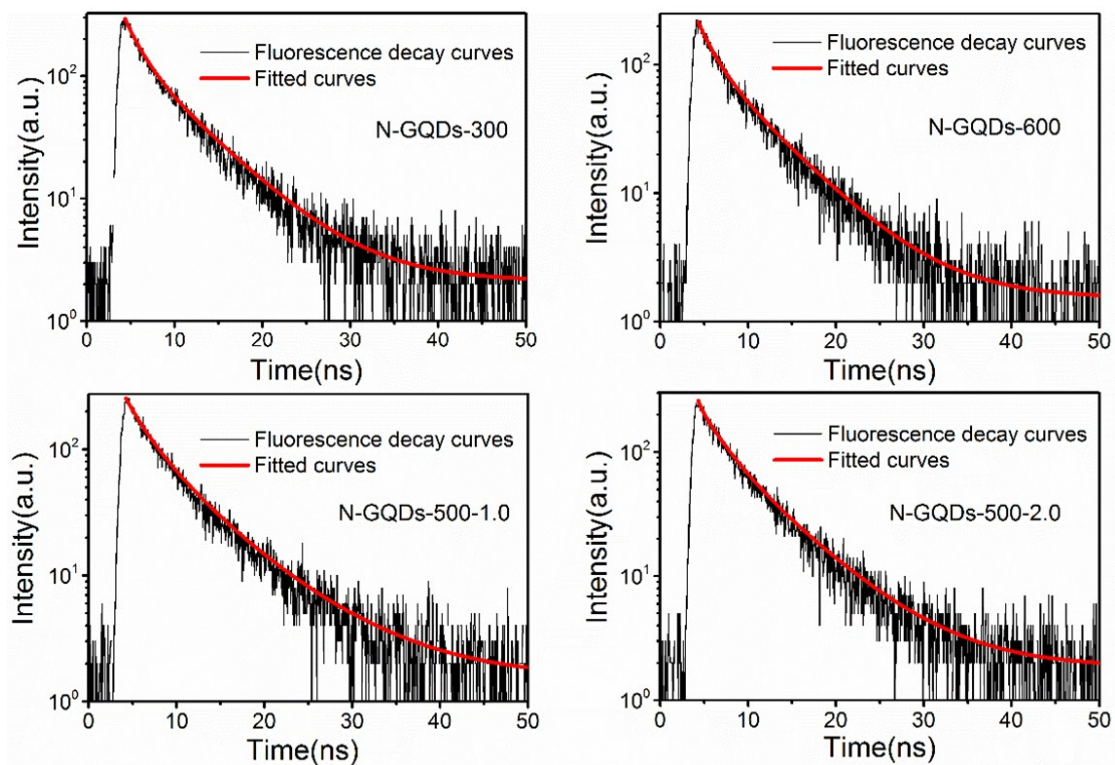

**Figure S18.** PL lifetime of N-GQDs aqueous solution excited at 468 nm.
